# Supplementary material for: Interventions addressing men, masculinities and gender equality in sexual and reproductive health and rights: an evidence and gap map and systematic review of reviews
Source: PubMed Central journal article supplement (PMC6747894; doi:10.1136/bmjgh-2019-001634), 2019-09-11
Supplement: bmjgh-2019-001634supp001.pdf [file bmjgh-2019-001634supp001.pdf]

## Appendices

### Appendix 1. Included reviews categorised by intentionality of gender-transformative intervention inclusion

| <b>Category A</b><br><i>Sought to include gender-transformative interventions</i> | <b>Category B</b><br><i>Did not seek to include gender-transformative interventions, yet at least one gender-transformative intervention was included.</i> |
|-----------------------------------------------------------------------------------|------------------------------------------------------------------------------------------------------------------------------------------------------------|
| (Bacchus et al., 2017)                                                            | (Anderson et al., 2013)                                                                                                                                    |
| (Casey et al., 2018)                                                              | (Arango et al., 2014)                                                                                                                                      |
| (Chatterjee, 2015)                                                                | (Arias et al., 2013)                                                                                                                                       |
| (Dworkin et al., 2013)                                                            | (Bakrania et al., 2017)                                                                                                                                    |
| (Ellsberg et al., 2015)                                                           | (Bourey et al., 2015)                                                                                                                                      |
| (Feder et al., 2008)                                                              | (DeGue et al., 2014)                                                                                                                                       |
| (Gibbs et al., 2012)                                                              | (Denison et al., 2009)                                                                                                                                     |
| (Haberland, 2015)                                                                 | (Harrison et al., 2010)                                                                                                                                    |
| (Hartmann et al., 2016)                                                           | (Jennings et al., 2017)                                                                                                                                    |
| (Heise, 2011)                                                                     | (Krishnaratne et al., 2016)                                                                                                                                |
| (Jewell & Wormith, 2010)                                                          | (Lacroix et al., 2013)                                                                                                                                     |
| (Keleher & Franklin, 2008)                                                        | (Lopez et al., 2009)                                                                                                                                       |
| (Kraft et al., 2014)                                                              | (McCloskey et al., 2016)                                                                                                                                   |
| (Muralidharan et al., 2015)                                                       | (Napierala Mavedzenge et al., 2010)                                                                                                                        |
| (Remme et al., 2014)                                                              | (Rankin et al., 2016)                                                                                                                                      |
| (Ricardo et al., 2011)                                                            | (Rees et al., 2014)                                                                                                                                        |
| (Schrivver et al., 2017)                                                          | (Sarkar et al., 2015)                                                                                                                                      |
| (Small et al., 2013)                                                              | (Skevington et al., 2013)                                                                                                                                  |
| (Tokhi et al., 2018)                                                              | (Smedslund et al., 2011)                                                                                                                                   |
|                                                                                   | (Storer et al., 2015)                                                                                                                                      |

## Appendix 2. Search strategy

Search terms related to SRHR were adapted from Warren et al (2015) with the addition of “maternal mortality”, “forced sex” “sexual slavery”, “sexual exploitation” “coercive control”, “child prostitut\*”, “child trafficking”, “trafficking of child\*”, “female genital mutilation”, “FGM”, “female genital cutting”, “FGMC”, “female circumcis\*”, “fertile\*”, “infertil\*”, (early and marriage), (child and marriage), (forced and marriage), (arranged and marriage), (abduction and marriage). Terms related to FGM and child marriage were adapted from Greene (2014) and Karumbi et al (2017). A number of more generic terms not specifically related to SRHR were removed from Warren et al (2015) string (e.g. “violence” “physical assault”).

Terms related to males and masculinities were developed and tested in a number of databases to ensure they captured all relevant papers. An edited Pearl Harvesting approach to searching databases for systematic reviews was utilised to identify systematic review papers (Sandieson, 2006). Two terms were removed from Sandieson’s original Systematic Review search string due to them producing a large number of irrelevant articles (“qualitative synthesis” and “realist synthesis”). While the Pearl Harvesting approach produced a large number of search results, after testing a number of more simplified searches for systematic reviews it was found that a number of potentially relevant articles would be missed without it. Search terms related to trials were adapted from Cochrane approved guidance (Eady, Wilczynski, & Haynes, 2008; Watson & Richardson, 1999). SRHR, men and masculinities, systematic review, and trial search strings were combined and tested in three key databases (Medline, PsycINFO, Embase) before final agreement for terms was reached.

| Search terms used                                                            |                                                                                                                                                                                                                                                                                                                                                                                                                                                                                                                                                                                                                                                                                                                                                                                                                                                                                                                                                                                                                                                                                                                                                                                                                                                                                                                                                                                                                                                                                                                                                                                                                   |
|------------------------------------------------------------------------------|-------------------------------------------------------------------------------------------------------------------------------------------------------------------------------------------------------------------------------------------------------------------------------------------------------------------------------------------------------------------------------------------------------------------------------------------------------------------------------------------------------------------------------------------------------------------------------------------------------------------------------------------------------------------------------------------------------------------------------------------------------------------------------------------------------------------------------------------------------------------------------------------------------------------------------------------------------------------------------------------------------------------------------------------------------------------------------------------------------------------------------------------------------------------------------------------------------------------------------------------------------------------------------------------------------------------------------------------------------------------------------------------------------------------------------------------------------------------------------------------------------------------------------------------------------------------------------------------------------------------|
| Search combination: #1 AND #2 AND #3 AND #4 (limited to Human; 2007-present) |                                                                                                                                                                                                                                                                                                                                                                                                                                                                                                                                                                                                                                                                                                                                                                                                                                                                                                                                                                                                                                                                                                                                                                                                                                                                                                                                                                                                                                                                                                                                                                                                                   |
| #1 SRHR                                                                      | sexual health or reproductive health or maternal health or maternal welfare or maternal mortality or neonatal health or perinatal care or perinatal health or prenatal care or prenatal health or antenatal health or ante-natal health or postnatal health or post-natal health or post-part* or post part* or newborn health or family planning or contracepti* or condoms or condom or pregnan* or abortion or induced abortion or abort* or birth or miscarriage or spontaneous abortion or stillb* or Minimum Initial Service Package or obstetric* or gynecology or gynaecology or safe motherhood or safe delivery or skilled birth attend* or sexually transmitted infection* or sexually transmitted disease* or HIV or Human immunodeficiency virus or AIDS or acquired immune deficiency syndrome or PMTCT or rectovaginal fistula or urethra fistula or urinary tract fistula or genital trauma or genital injury or vaginal trauma or vaginal injury or gender-based violence or gender based violence or partner violence or family violence or violence against women or domestic violence or sexual abuse or sex crime or sexual crime or domestic violence or sexual violence or rape or intimate partner violence or partner violence or partner abuse or sexual assault or sexual harassment or sexual coercion or forced sex or sexual slavery or sexual exploitation or coercive control or child prostitut* or child trafficking or trafficking of child* or female genital mutilation or FGM or female genital cutting or FGMC or female circumcis* or fertile* or infertil* or (early and |

|                            |                                                                                                                                                                                                                                                                                                                                                                                                                                                                                                                                                                                                                                                                                                                                                                                                                                                                                                         |
|----------------------------|---------------------------------------------------------------------------------------------------------------------------------------------------------------------------------------------------------------------------------------------------------------------------------------------------------------------------------------------------------------------------------------------------------------------------------------------------------------------------------------------------------------------------------------------------------------------------------------------------------------------------------------------------------------------------------------------------------------------------------------------------------------------------------------------------------------------------------------------------------------------------------------------------------|
|                            | marriage) or (child and marriage) or (forced and marriage) or (arranged and marriage) or (abduction and marriage)                                                                                                                                                                                                                                                                                                                                                                                                                                                                                                                                                                                                                                                                                                                                                                                       |
| #2 Males/<br>Masculinities | men or man or male or males or boy or boys or masculin* or father* or gender or equality                                                                                                                                                                                                                                                                                                                                                                                                                                                                                                                                                                                                                                                                                                                                                                                                                |
| #3 Systematic<br>Review    | "data synthesis" or "evidence synthesis" or metasynthesis or meta-synthesis or "narrative synthesis" or "quantitative synthesis" or "research synthesis" or "synthesis of evidence" or "thematic synthesis" or metaanaly* or meta-analy* or metaanalysis or meta-analysis or systematic or "systematic map*" or "systematic overview*" or "systematic review*" or "systematically review*" or "bibliographic search" or "database search" or "electronic search" or handsearch* or "hand search*" or "keyword search" or "literature search" or "search term*" or "article reviews" or "literature review" or "overview of reviews" or "review literature" or "reviewed the literature" or "reviews studies" or "this review" or "scoping stud*" or "overview study" or "overview of the literature" or meta-ethnograph* or meta-epidemiological or "data extraction" or "meta-regression" [title only] |
| #4 Trials                  | random* or trial or placebo or group or groups or intervention or interventions                                                                                                                                                                                                                                                                                                                                                                                                                                                                                                                                                                                                                                                                                                                                                                                                                         |

### Appendix 3. Evidence and Gap Map Screening and Categorisation form

1. Is this paper a systematic review about sexual and reproductive health interventions and including men? [Systematic Review = systematic search used]  
Yes No Can't tell
2. Does this systematic review include RCT (experimental with randomisation) or quasi-experimental  
Yes No Can't tell
3. What area of WHO Reproductive Health Strategy do the outcomes of the review fall under? (checkbox)
  - a. Helping people realise their desired family size (i.e. contraception and family planning; prevention and treatment)
  - b. Health of pregnant women and girls and their newborn infants (i.e. maternal and infant mortality)
  - c. **Preventing unsafe abortion**
  - d. **Promoting Sexual Health and Wellbeing (i.e. prevention of reproductive tract and sexually transmitted infection)**
  - e. **Sexual and Reproductive Health in disease outbreaks (i.e. Ebola and Zika)**
  - f. Healthy Adolescence for a Healthy Future (i.e. any of the areas covered in other domains focusing on adolescent)
  - g. Preventing and responding to violence against women and girls (i.e. IPV, sexual violence) and harmful practice
  - h. Can't tell if above ticked area(s) is exhaustive list
  - i. Can't tell what areas covered None of the above

4. Does the review seek to distinguish studies that are gender-transformative?

["Gender-transformative" is defined by the World Health Organization (WHO) as programmes '**that addresses the causes of gender-based health inequities by including ways to transform harmful gender norms, roles and relations.** The objective of such programmes is often to promote gender equality between women and men' (WHO, 2011: 78). In our case we are looking for gender-transformative approaches with men – so they have to engage men in transforming either a. gender norms (masculinities); or b. gender roles (men's practices); or c. gender relations (unequal relations between men and women) to achieve sexual and reproductive health outcomes. The review should state whether or not it included, or wholly focussed on, gender-transformative approaches to outcomes.]

Yes No Can't tell

5. Were the interventions delivered in high, middle, or low income countries?  
Low Middle High Can't tell

**Appendix 4. Systematic Review of Reviews Data Extraction form (Post-pilot version)**

1. What area of WHO Reproductive Health Strategy does this review fall under? (Select checkbox and state area review focuses on)
  - a. Helping people realise their desired family size (i.e. contraception and family planning; prevention and treatment of infertility)
  - b. Health of pregnant women and girls and their newborn infants (i.e. maternal and infant mortality; preventing complications in pregnancy, childbirth and the postnatal period)
  - c. Preventing unsafe abortion
  - d. Promoting Sexual Health and Wellbeing (i.e. prevention of reproductive tract and sexually transmitted infections; HIV; sexuality related human rights abuses (e.g. sexual coercion)
  - e. Sexual and Reproductive Health in disease outbreaks (i.e. Ebola and Zika)
  - f. Healthy Adolescence for a Healthy Future (i.e. any of the areas covered in other domains focusing on adolescents only)
  - g. Preventing and responding to violence against women and girls (i.e. IPV, sexual violence) and harmful practices (i.e. FGM; early child forced marriage)
  - h. Can't tell
2. Date range of search
3. Documented search strategy
  - a. Search terms reported (y/n)
  - b. Location of search specified (databases) (y/n)
  - c. Inclusion/Exclusion criteria applied (detail)
  - d. Language restrictions (detail)
  - e. Other search detail (detail)
4. Number of studies reviewed
5. Review Aims/Objectives
6. Were the interventions delivered in high, middle, or low income countries?
  - a. Low
  - b. Middle
  - c. High
  - d. Not reported
7. Types of studies included (RCT n=x; quasi-experimental n=y; other study design n=z)
  - a. RCTs (number)
  - b. Quasi-Experimental (number)
  - c. Other study designs (number)
  - d. Not reported (detail)
8. Number of gender-transformative experimental studies (quasi-experimental/RCT)
9. Included gender-transformative intervention detail
  - a. Programme name/description; population
  - b. Men only (y/n)
  - c. Community level (y/n)
  - d. WHO domain (1-7)
  - e. Country (name)
  - f. Study design
  - g. No of participants
  - h. Participants (m/f)
  - i. GT aim of review or aim of included stud(ies)
  - j. Review outcomes & conclusions
  - k. Review limitations

**Appendix 5. Proportion of reviews included in EGM reporting on interventions using a gender-transformative approach**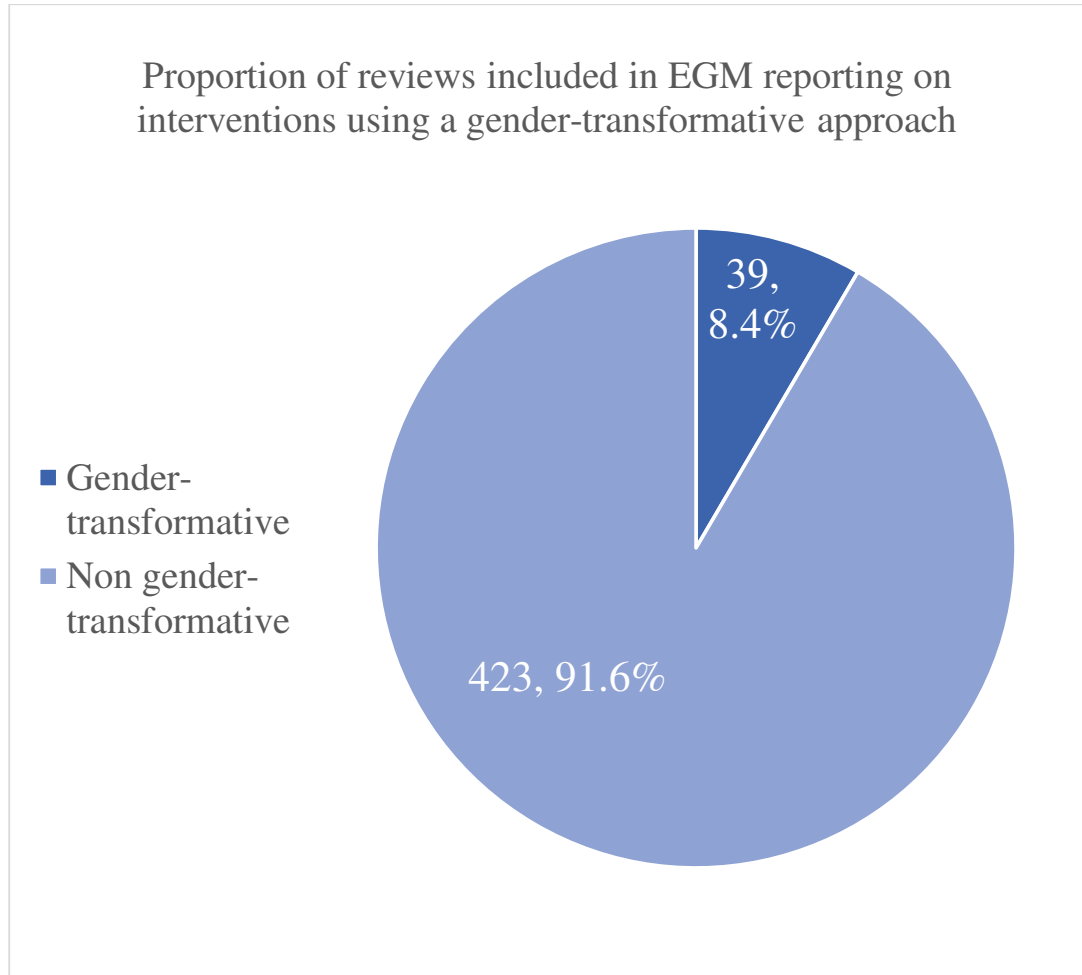

## Appendix 6

### AMSTAR2 Quality rating of included reviews<sup>1</sup>

| Study           | AMSTAR 2 Rating |    |    |    |    |    |    |    |    |     |     |     |     |     |     |     | Overall rating |
|-----------------|-----------------|----|----|----|----|----|----|----|----|-----|-----|-----|-----|-----|-----|-----|----------------|
|                 | Q1              | Q2 | Q3 | Q4 | Q5 | Q6 | Q7 | Q8 | Q9 | Q10 | Q11 | Q12 | Q13 | Q14 | Q15 | Q16 |                |
| Anderson 2013   | N               | N  | N  | N  | N  | N  | N  | N  | N  | N   | NC  | NC  | N   | N   | NC  | Y   | Critically low |
| Arias 2013      | N               | N  | N  | P  | N  | Y  | N  | N  | N  | N   | Y   | N   | N   | N   | NC  | Y   | Critically low |
| Bacchus 2017    | N               | N  | N  | N  | N  | N  | N  | Y  | N  | N   | NC  | NC  | N   | N   | NC  | Y   | Critically low |
| WHO 2007        | N               | N  | N  | N  | N  | Y  | N  | P  | N  | N   | NC  | NC  | N   | N   | NC  | N   | Critically low |
| Bourey 2015     | N               | Y  | N  | P  | Y  | Y  | N  | P  | Y  | N   | NC  | NC  | Y   | N   | NC  | Y   | Critically low |
| Casey 2018      | N               | N  | N  | N  | N  | N  | N  | N  | N  | N   | NC  | NC  | N   | N   | NC  | Y   | Critically low |
| Chatterjee 2015 | Y               | N  | N  | N  | N  | N  | N  | P  | N  | N   | NC  | NC  | N   | N   | NC  | N   | Critically low |
| DeGue 2014      | N               | N  | Y  | N  | N  | Y  | N  | P  | N  | N   | NC  | NC  | Y   | N   | NC  | N   | Critically low |
| Denison 2009    | Y               | N  | N  | Y  | Y  | Y  | Y  | Y  | Y  | Y   | Y   | Y   | Y   | Y   | N   | N   | Low            |

<sup>1</sup> The AMSTAR2 tool (Shea et al., 2017) was used to assess the methodological quality of these systematic reviews. This version of the original AMSTAR tool was developed specifically for the purposes of assessing quality of systematic reviews reporting on interventions that utilised either randomised or non-randomised study designs in healthcare settings. In accordance with guidance by Shea et al. (2017), the overall rating represented the reviewers' overall confidence in the results of each review. A high quality rating was assigned if no or one non-critical weakness was identified, moderate quality with more than one non-critical weakness, low quality with one critical flaw and critically low quality with more than one critical flaw. Reasons for included reviews being rated as critically low were the identification of more than one major methodological weaknesses, such as (i) not reporting explicitly that the review methods were established prior to the conduct of the review with a registered protocol; (ii) an inadequate search of the literature; (iii) no justification for excluding individual studies; (iv) no assessment of the risk of bias from individual studies included; (v) no consideration of risk of bias when interpreting results from the review; and/or (vi) no assessment of publication bias.

| Study           | AMSTAR 2 Rating |    |    |    |    |    |    |    |    |     |     |     |     |     |     |     | Overall rating |
|-----------------|-----------------|----|----|----|----|----|----|----|----|-----|-----|-----|-----|-----|-----|-----|----------------|
|                 | Q1              | Q2 | Q3 | Q4 | Q5 | Q6 | Q7 | Q8 | Q9 | Q10 | Q11 | Q12 | Q13 | Q14 | Q15 | Q16 |                |
| Dworkin 2013    | N               | N  | N  | N  | N  | N  | N  | P  | N  | N   | NC  | NC  | N   | N   | NC  | N   | Critically low |
| Ellsberg 2015   | N               | N  | N  | P  | Y  | Y  | N  | N  | N  | N   | NC  | NC  | Y   | Y   | NC  | Y   | Critically low |
| Feder 2008      | Y               | N  | N  | P  | Y  | Y  | P  | P  | P  | N   | N   | N   | Y   | Y   | N   | Y   | Critically low |
| Gibbs 2012      | N               | N  | N  | P  | N  | N  | N  | N  | N  | N   | NC  | NC  | N   | N   | NC  | Y   | Critically low |
| Haberland 2015  | N               | N  | N  | N  | N  | Y  | N  | N  | N  | N   | NC  | NC  | N   | Y   | NC  | N   | Critically low |
| Harrison 2010   | Y               | N  | N  | P  | N  | N  | N  | P  | N  | N   | NC  | NC  | N   | N   | NC  | Y   | Critically low |
| Heise 2011      | N               | N  | N  | N  | N  | N  | N  | P  | N  | N   | NC  | NC  | N   | N   | NC  | Y   | Critically low |
| Jennings 2017   | N               | N  | N  | N  | N  | N  | N  | N  | N  | N   | NC  | NC  | N   | N   | NC  | N   | Critically low |
| Jewell 2010     | N               | N  | N  | N  | N  | Y  | Y  | P  | N  | N   | Y   | N   | N   | Y   | N   | N   | Critically low |
| Keleher 2008    | N               | N  | N  | N  | N  | N  | N  | N  | N  | N   | NC  | NC  | N   | N   | NC  | N   | Critically low |
| Kraft 2014      | N               | N  | N  | N  | N  | N  | N  | N  | N  | N   | NC  | NC  | N   | N   | NC  | Y   | Critically low |
| LaCroix 2013    | Y               | N  | N  | P  | N  | Y  | N  | N  | N  | N   | Y   | N   | N   | N   | Y   | Y   | Critically low |
| Lopez 2009      | Y               | N  | N  | Y  | Y  | Y  | N  | N  | P  | N   | NC  | NC  | N   | N   | NC  | Y   | Critically low |
| Mavedzenge 2010 | Y               | N  | N  | Y  | Y  | N  | N  | P  | N  | N   | NC  | NC  | N   | N   | NC  | Y   | Critically low |
| McCloskey 2016  | N               | N  | N  | N  | N  | N  | N  | P  | N  | N   | NC  | NC  | N   | N   | NC  | N   | Critically low |



| Study             | AMSTAR 2 Rating |    |    |    |    |    |    |    |    |     |     |     |     |     |     |     | Overall rating |
|-------------------|-----------------|----|----|----|----|----|----|----|----|-----|-----|-----|-----|-----|-----|-----|----------------|
|                   | Q1              | Q2 | Q3 | Q4 | Q5 | Q6 | Q7 | Q8 | Q9 | Q10 | Q11 | Q12 | Q13 | Q14 | Q15 | Q16 |                |
| Muralidharan 2015 | N               | N  | N  | P  | Y  | Y  | N  | N  | N  | N   | NC  | NC  | N   | N   | NC  | N   | Critically low |
| Rankin 2016       | N               | N  | Y  | Y  | N  | Y  | N  | N  | N  | N   | NC  | NC  | N   | N   | NC  | Y   | Critically low |
| Rees 2014         | N               | N  | N  | P  | N  | N  | N  | N  | N  | N   | NC  | NC  | N   | N   | NC  | Y   | Critically low |
| Remme 2014        | N               | N  | N  | N  | N  | Y  | N  | P  | N  | N   | NC  | NC  | N   | N   | NC  | Y   | Critically low |
| Ricardo 2011      | Y               | N  | Y  | P  | N  | N  | N  | P  | Y  | N   | NC  | NC  | Y   | N   | NC  | N   | Critically low |
| Sarkar 2015       | N               | N  | N  | N  | Y  | Y  | Y  | N  | N  | N   | NC  | NC  | N   | N   | NC  | Y   | Critically low |
| Schrivier 2017    | N               | N  | N  | N  | N  | N  | N  | N  | N  | N   | NC  | NC  | N   | N   | NC  | Y   | Critically low |
| Skevington 2013   | Y               | N  | Y  | P  | N  | Y  | N  | P  | N  | N   | NC  | NC  | N   | N   | NC  | N   | Critically low |
| Small 2013        | N               | N  | N  | N  | Y  | Y  | N  | P  | P  | N   | NC  | NC  | N   | N   | NC  | N   | Critically low |
| Smedslund 2011    | Y               | Y  | Y  | Y  | Y  | Y  | Y  | Y  | Y  | N   | Y   | Y   | Y   | Y   | Y   | Y   | High           |
| Storer 2015       | N               | N  | N  | N  | N  | N  | N  | P  | N  | N   | NC  | NC  | N   | N   | NC  | Y   | Critically low |
| Tokhi 2018        | Y               | Y  | Y  | P  | Y  | Y  | N  | N  | Y  | N   | NC  | NC  | N   | N   | NC  | Y   | Critically low |

Abbreviations: Yes (Y), No (N), Partial Yes (P), Not Conducted (NC)

## Appendix 7

### Gender-transformative interventions included in each review<sup>2</sup>

| Review author(s)<br>Conclusion:<br>Positive Effect<br>No Effect<br>Inconclusive / Mixed | Intervention author(s) | Year | Programme name/description | Delivery* |                 | WHO Domain (1-7)<br>† | Country      | Design | No of Participants | Participants m/f | Intervention objective: gender-transformative Aim/By-product |
|-----------------------------------------------------------------------------------------|------------------------|------|----------------------------|-----------|-----------------|-----------------------|--------------|--------|--------------------|------------------|--------------------------------------------------------------|
|                                                                                         |                        |      |                            | Men only  | Community level |                       |              |        |                    |                  |                                                              |
| <b>Anderson et al. 2013</b><br>Positive Effect                                          | Jewkes et al           | 2008 | Stepping Stones            | No        | No              | 1,4,6,7               | South Africa | RCT    | 2776               | NR               | Aim                                                          |
| Arias et al. 2013<br>Inconclusive / Mixed                                               | Saunders               | 1996 | Duluth + CBT               | NR        | NR              | 7                     | NR           | Quasi  | 129                | NR               | Aim                                                          |
|                                                                                         | Dobash et al.          | 1996 | Duluth                     | NR        | NR              | 7                     | NR           | Quasi  | 40                 | NR               | Aim                                                          |
|                                                                                         | Murphy et al.          | 1998 | Duluth                     | NR        | NR              | 7                     | NR           | Quasi  | 235                | NR               | Aim                                                          |
|                                                                                         | Babcock & Steiner      | 1999 | Duluth                     | NR        | NR              | 7                     | NR           | Quasi  | 106                | NR               | Aim                                                          |
|                                                                                         | Jones & Gondolf        | 2002 | Duluth                     | NR        | NR              | 7                     | NR           | Quasi  | 853                | NR               | Aim                                                          |
|                                                                                         | Bowen et al.           | 2005 | Duluth                     | NR        | NR              | 7                     | NR           | Quasi  | 86                 | NR               | Aim                                                          |
|                                                                                         | Bennet et al.          | 2005 | Duluth                     | NR        | NR              | 7                     | NR           | Quasi  | 384                | NR               | Aim                                                          |
|                                                                                         | Labriola et al.        | 2005 | Duluth                     | NR        | NR              | 7                     | NR           | Quasi  | 157                | NR               | Aim                                                          |
|                                                                                         | Tollefson & Gross      | 2006 | Duluth                     | NR        | NR              | 7                     | NR           | Quasi  | 102                | NR               | Aim                                                          |
|                                                                                         | Coulter & Van de Weerd | 2009 | Duluth                     | NR        | NR              | 7                     | NR           | Quasi  | 12522              | NR               | Aim                                                          |
|                                                                                         | Davis et al.           | 1998 | Duluth                     | NR        | NR              | 7                     | NR           | RCT    | 376                | NR               | Aim                                                          |
|                                                                                         | Feder & Dugan          | 2004 | Duluth                     | NR        | NR              | 7                     | NR           | RCT    | 404                | NR               | Aim                                                          |
|                                                                                         | Stith et al.           | 2004 | Duluth + CBT               | NR        | NR              | 7                     | NR           | RCT    | 39                 | NR               | Aim                                                          |
|                                                                                         | Lin et al.             | 2009 | Duluth + CBT               | NR        | NR              | 7                     | NR           | RCT    | 301                | NR               | Aim                                                          |

<sup>2</sup>Of the 226 gender-transformative intervention studies in which study characteristics of interest could be identified from reviews, the majority included males and females in the intervention studies (n=126, 55.8%), 71 (31.4%) were delivered to males only, and for 29 (12.8%) of these interventions this data could not be extracted from the reviews. Regarding intervention delivery, approximately a quarter was delivered at community level (n=63, 27.9%), half was delivered at individual or targeted group (n=115, 50.9%), and this data could not be extracted from reviews for 48 interventions (21.2%).

| Review author(s)<br>Conclusion:<br>Positive Effect<br>No Effect<br>Inconclusive / Mixed | Intervention author(s)  | Year         | Programme name/description                                                    | Delivery* |                 | WHO Domain (1-7)<br>† | Country       | Design      | No of Participants                                                                                    | Participants m/f                                                                                                                                                                                                   | Intervention objective: gender-transformative Aim/By-product |
|-----------------------------------------------------------------------------------------|-------------------------|--------------|-------------------------------------------------------------------------------|-----------|-----------------|-----------------------|---------------|-------------|-------------------------------------------------------------------------------------------------------|--------------------------------------------------------------------------------------------------------------------------------------------------------------------------------------------------------------------|--------------------------------------------------------------|
|                                                                                         |                         |              |                                                                               | Men only  | Community level |                       |               |             |                                                                                                       |                                                                                                                                                                                                                    |                                                              |
|                                                                                         | Taylor & Maxwell        | 2009         | Duluth                                                                        | NR        | NR              | 7                     | NR            | RCT         | 629                                                                                                   | NR                                                                                                                                                                                                                 | Aim                                                          |
| <b>Bacchus et al. 2017</b><br><br>Positive Effect                                       | Ashburn <i>et al.</i>   | 2016         | Responsible, Engaged and Loving (REAL) Fathers                                | Yes       | No              | 6,7                   | Uganda        | RCT         | 250 intervention; 250 control                                                                         | 100% male                                                                                                                                                                                                          | Aim                                                          |
|                                                                                         | Kyegombe <i>et al.</i>  | 2015         | SASA!                                                                         | No        | Yes             | 6,7                   | Uganda        | RCT         | 1538 (baseline); 2532 (4 year follow up) *not divided by intervention/control                         | NR                                                                                                                                                                                                                 | Aim                                                          |
|                                                                                         | Abramsky <i>et al.</i>  | 2014<br>2016 | SASA!                                                                         | No        | Yes             | 6,7                   | Uganda        | RCT         | Baseline: 793 (intervention), 790 (control); Four Year Follow up: 1368 (intervention), 1164 (control) | Intervention: n=374 women, n = 419 men Control: n = 343 women, n = 447 men. At four year follow up: Intervention communities: n = 600 women and n = 768 men and Control communities: n = 530 women and n = 634 men | Aim                                                          |
| <b>Bourey et al. 2015</b><br><br>Positive Effect                                        | Green                   | 2015         | WING: Women's Income Generating Support (WINGS)                               | No        | No              | 6,7                   | Uganda        | Cluster RCT | 1734                                                                                                  | NR                                                                                                                                                                                                                 | NR                                                           |
|                                                                                         | Gupta                   | 2013         | Gender Dialogue Groups (GDG) for VLSA (Village Savings and Loans Association) | No        | No              | 7                     | Cote d'Ivoire | Cluster RCT | 913-934                                                                                               | NR                                                                                                                                                                                                                 | NR                                                           |
|                                                                                         | Jewkes <i>et al.</i>    | 2008         | Stepping Stones                                                               | No        | No              | 7                     | South Africa  | Cluster RCT | 1041-1093                                                                                             | 537-559 Women/ 504-534 Men                                                                                                                                                                                         | NR                                                           |
|                                                                                         | Pulerwitz               | 2015         | Male Norms Initiative                                                         | Yes       | No              | 6,7                   | Ethiopia      | Cluster RCT | 645                                                                                                   | 645 Men                                                                                                                                                                                                            | NR                                                           |
| <b>Casey et al. 2018</b><br><br>Positive Effect                                         | Abramsky <i>et al.</i>  | 2014         | SASA!                                                                         | No        | Yes             | 7                     | Uganda        | NR          | NR                                                                                                    | 100% male                                                                                                                                                                                                          | Aim                                                          |
|                                                                                         | Hossain <i>et al.</i>   | 2014         | "Men and Women in Partnership Initiative"                                     | No        | No              | 7                     | Cote d'Ivoire | NR          | NR                                                                                                    | NR                                                                                                                                                                                                                 | By-product                                                   |
|                                                                                         | Jewkes <i>et al.</i>    | 2014         | "Stepping Stones and Creating Futures"                                        | No        | No              | 7                     | South Africa  | NR          | NR                                                                                                    | NR                                                                                                                                                                                                                 | Aim                                                          |
|                                                                                         | Kalichman <i>et al.</i> | 2009         | "GBV/HIV versus Alcohol/HIV"                                                  | Yes       | No              | 7                     | South Africa  | NR          | NR                                                                                                    | NR                                                                                                                                                                                                                 | By-product                                                   |
|                                                                                         | Krishnan <i>et al.</i>  | 2012         | "RESPECT"                                                                     | No        | No              | 7                     | Tanzania      | NR          | NR                                                                                                    | NR                                                                                                                                                                                                                 | Aim                                                          |
|                                                                                         | Kyegombe <i>et al.</i>  | 2014         | SASA!                                                                         | Yes       | Yes             | 7                     | Uganda        | NR          | NR                                                                                                    | 100% male                                                                                                                                                                                                          | Aim                                                          |

| Review author(s)<br>Conclusion:<br>Positive Effect<br>No Effect<br>Inconclusive / Mixed | Intervention author(s)  | Year                   | Programme name/description                                                | Delivery* |                 | WHO Domain (1-7)<br>† | Country            | Design | No of Participants                    | Participants m/f                            | Intervention objective: gender-transformative Aim/By-product |
|-----------------------------------------------------------------------------------------|-------------------------|------------------------|---------------------------------------------------------------------------|-----------|-----------------|-----------------------|--------------------|--------|---------------------------------------|---------------------------------------------|--------------------------------------------------------------|
|                                                                                         |                         |                        |                                                                           | Men only  | Community level |                       |                    |        |                                       |                                             |                                                              |
|                                                                                         | Miller <i>et al.</i>    | 2014                   | "Parivartan— Adaptation of Coaching Boys into Men"                        | Yes       | No              | 6,7                   | India              | NR     | NR                                    | NR                                          | Aim                                                          |
|                                                                                         | Pulerwitz <i>et al.</i> | 2015                   | "Male Norms Initiative"                                                   | Yes       | Yes             | 6,7                   | Ethiopia           | NR     | NR                                    | 100% male                                   | Aim                                                          |
|                                                                                         | Salazar <i>et al.</i>   | 2014                   | "Real Consent"                                                            | No        | No              | 7                     | United States      | NR     | NR                                    | NR                                          | Aim                                                          |
|                                                                                         | Wagman <i>et al.</i>    | 2015                   | "The Safe Homes and Respect for Everyone Project"                         | No        | Yes             | 6,7                   | Uganda             | NR     | NR                                    | 100% male                                   | By-product                                                   |
| <b>DeGue <i>et al.</i> 2014</b><br><br>Inconclusive / Mixed                             | Foshee <i>et al.</i>    | 1998, 2000, 2004, 2005 | Safe Dates                                                                | NR        | No              | 6,7                   | NR                 | RCT    | NR (14 schools)                       | NR                                          | Aim                                                          |
|                                                                                         | Gidycz <i>et al.</i>    | 2011                   | The Men's Project                                                         | Yes       | No              | 6,7                   | NR                 | RCT    | NR                                    | NR                                          | Aim                                                          |
| <b>Denison <i>et al.</i> 2009</b><br><br>Inconclusive / Mixed                           | Chege                   | 2004                   | Education through behaviour change communication activities, and advocacy | No        | Yes             | 1,7                   | Ethiopia and Kenya | Quasi  | 2259                                  | 1113 Male/ 1126 Female                      | Aim                                                          |
|                                                                                         | Diop                    | 2004                   | Education in hygiene, problem solving, women's health, human rights       | No        | Yes             | 7                     | Senegal            | Quasi  | 1332                                  | 557 Male/ 775 Female                        | Aim                                                          |
|                                                                                         | Ouoba                   | 2004                   | Education in hygiene, problem solving, women's health, human rights       | No        | Yes             | 7                     | Burkina Faso       | Quasi  | 1465                                  | 1047 Male/ 718 Female                       | Aim                                                          |
|                                                                                         | Babalola                | 2006                   | Community mobilization; advocacy; mass media activities                   | No        | Yes             | 7                     | Nigeria            | Quasi  | 957                                   | 426 Male/ 531 Female                        | Aim                                                          |
| <b>Dworkin <i>et al.</i> 2013</b>                                                       | Cupples <i>et al.</i>   | 2008                   | "M.A.R.S. Male Advocates for Responsible Sexuality"                       | No        | Yes             | 6,7                   | USA                | Quasi  | 300                                   | 53% male                                    | Aim                                                          |
|                                                                                         | Jewkes <i>et al.</i>    | 2008                   | "Stepping Stones"                                                         | No        | Yes             | 6,7                   | South Africa       | RCT    | 1140 (intervention)<br>1081 (control) | Intervention (51% male); Control (50% male) | By-product                                                   |

| Review author(s)<br>Conclusion:<br>Positive Effect<br>No Effect<br>Inconclusive / Mixed | Intervention author(s)  | Year | Programme name/description                                                                                                                                                                 | Delivery* |                 | WHO Domain (1-7)<br>† | Country       | Design | No of Participants                      | Participants m/f | Intervention objective: gender-transformative Aim/By-product |
|-----------------------------------------------------------------------------------------|-------------------------|------|--------------------------------------------------------------------------------------------------------------------------------------------------------------------------------------------|-----------|-----------------|-----------------------|---------------|--------|-----------------------------------------|------------------|--------------------------------------------------------------|
|                                                                                         |                         |      |                                                                                                                                                                                            | Men only  | Community level |                       |               |        |                                         |                  |                                                              |
| Positive Effect                                                                         | Kalichman <i>et al.</i> | 2009 | "Phaphama Men"                                                                                                                                                                             | Yes       | No              | 7                     | South Africa  | Quasi  | 229 (intervention); 203 (control)       | 100% male        | Aim                                                          |
|                                                                                         | Miller <i>et al.</i>    | 2012 | "Coaching Boys into Men"                                                                                                                                                                   | Yes       | No              | 6,7                   | USA           | RCT    | 847 (intervention); 951 (control)       | 100% male        | Aim                                                          |
|                                                                                         | Pulerwitz <i>et al.</i> | 2010 | "Male Norms Initiative"                                                                                                                                                                    | Yes       | Yes             | 6,7                   | Ethiopia      | Quasi  | 251 (arm 1); 235 (arm 2); 159 (arm 3)   | 100% male        | Aim                                                          |
|                                                                                         | Pulerwitz <i>et al.</i> | 2006 | "Program H"                                                                                                                                                                                | Yes       | Yes             | 6,7                   | Brazil        | Quasi  | 217 (arm1); 190 (arm2); 180 (arm3)      | 100% male        | Aim                                                          |
|                                                                                         | Rhodes <i>et al.</i>    | 2011 | HoMBReS-2 (hombres mantenido bienestar y relaciones saludables-2/ men-2: men maintaining wellbeing and health relationships)                                                               | Yes       | No              | 7                     | USA           | RCT    | 58 (intervention); 64 (control)         | 100% male        | By-product                                                   |
|                                                                                         | Verma <i>et al.</i>     | 2008 | "Yaari-Dosti"                                                                                                                                                                              | Yes       | No              | 7                     | India         | Quasi  | 197 (arm1); 472 (arm2); 466 (arm3)      | 100% male        | Aim                                                          |
| Ellsberg <i>et al.</i> 2015<br><br>Positive Effect                                      | Jewkes <i>et al.</i>    | 2008 | Stepping Stones                                                                                                                                                                            | No        | No              | 6,7                   | South Africa  | RCT    | NR                                      | NR               | Unclear                                                      |
|                                                                                         | Verma <i>et al.</i>     | 2008 | Group 1. Received a lifestyle social marketing campaign and group education sessions (LSMC plus GES). Group 2. Received only the group education sessions. The third group was the control | Yes       | No              | 6,7                   | India         | Quasi  | NR                                      | 100% male        | Unclear                                                      |
|                                                                                         | Abramsky <i>et al.</i>  | 2014 | SASA!                                                                                                                                                                                      | No        | Yes             | 7                     | Uganda        | RCT    | NR                                      | NR               | Aim                                                          |
|                                                                                         | Diop <i>et al.</i>      | 2004 | Tostan                                                                                                                                                                                     | No        | Yes             | 6,7                   | Senegal       | RCT    | NR                                      | NR               | Aim                                                          |
|                                                                                         | Wagman <i>et al.</i>    | 2014 | SHARE                                                                                                                                                                                      | No        | Yes             | 6,7                   | Uganda        | RCT    | NR                                      | NR               | Unclear                                                      |
|                                                                                         | Duflo <i>et al.</i>     | 2006 | Evaluation comparing 3 school-based HIV/AIDS interventions in Kenya                                                                                                                        | No        | No              | 6,7                   | Kenya         | RCT    | 70000 students from 328 primary schools | NR               | Unclear                                                      |
|                                                                                         | Gupta <i>et al.</i>     | 2013 | Both an 8 session 16 week gender dialogue group (GDG) and an economic empowerment                                                                                                          | No        | No              | 7                     | Cote d'Ivoire | RCT    | NR                                      | NR               | Aim                                                          |

| Review author(s)<br>Conclusion:<br>Positive Effect<br>No Effect<br>Inconclusive / Mixed | Intervention author(s)  | Year | Programme name/description                                                                          | Delivery* |                 | WHO Domain (1-7)<br>† | Country      | Design | No of Participants            | Participants m/f | Intervention objective: gender-transformative Aim/By-product |
|-----------------------------------------------------------------------------------------|-------------------------|------|-----------------------------------------------------------------------------------------------------|-----------|-----------------|-----------------------|--------------|--------|-------------------------------|------------------|--------------------------------------------------------------|
|                                                                                         |                         |      |                                                                                                     | Men only  | Community level |                       |              |        |                               |                  |                                                              |
|                                                                                         |                         |      | group savings programme (VSLA) vs VSLA only                                                         |           |                 |                       |              |        |                               |                  |                                                              |
|                                                                                         | Haushofer <i>et al.</i> | 2013 | The Give Directly programme (unconditional cash transfers)                                          | No        | No              | 7                     | Kenya        | RCT    | 1010 primary women households | NR               | Unclear                                                      |
|                                                                                         | Hidrobo <i>et al.</i>   | 2013 | Cash, Food, and Voucher Program; households received 6 monthly transfers of vouchers, cash, or food | No        | No              | 6,7                   | Ecuador      | RCT    | NR                            | NR               | Unclear                                                      |
| <b>Feder <i>et al.</i> 2008</b>                                                         | Chen <i>et al.</i>      | 1989 | Cognitive-behavioural/ Psycho-educational                                                           | Yes       | No              | 7                     | USA          | Quasi  | NR                            | NR               | Aim                                                          |
| No Effect                                                                               | Davis <i>et al.</i>     | 2000 | Psycho-educational                                                                                  | Yes       | No              | 7                     | USA          | RCT    | NR                            | NR               | Aim                                                          |
|                                                                                         | Dunford                 | 2000 | Cognitive-behavioural                                                                               | Yes       | No              | 7                     | USA          | RCT    | NR                            | NR               | Aim                                                          |
|                                                                                         | Dutton                  | 1986 | Cognitive-behavioural                                                                               | Yes       | No              | 7                     | USA          | Quasi  | NR                            | NR               | Aim                                                          |
|                                                                                         | Feder & Forde           | 2000 | Cognitive-behavioural/ Psycho-educational                                                           | Yes       | No              | 7                     | USA          | RCT    | NR                            | NR               | Aim                                                          |
|                                                                                         | Gordon & Moriarty       | 2003 | Cognitive-behavioural/ Psycho-educational                                                           | Yes       | No              | 7                     | USA          | Quasi  | NR                            | NR               | Aim                                                          |
|                                                                                         | Harrell                 | 1991 | Cognitive-behavioural                                                                               | Yes       | No              | 7                     | USA          | Quasi  | NR                            | NR               | Aim                                                          |
|                                                                                         | Jones & Gondolf         | 2002 | Cognitive-behavioural                                                                               | Yes       | No              | 7                     | USA          | Quasi  | NR                            | NR               | Aim                                                          |
|                                                                                         | Palmer <i>et al.</i>    | 1992 | Psycho-educational                                                                                  | Yes       | No              | 7                     | USA          | RCT    | NR                            | NR               | Aim                                                          |
|                                                                                         | Syers & Edleson         | 1992 | Psycho-educational                                                                                  | Yes       | No              | 7                     | USA          | Quasi  | NR                            | NR               | Aim                                                          |
| <b>Gibbs <i>et al.</i> 2012</b>                                                         | Duflo <i>et al.</i>     | 2006 | Western Kenya Schooling Intervention                                                                | No        | No              | 6,7                   | Kenya        | RCT    | 70000                         | NR               | Unclear                                                      |
| Inconclusive / Mixed                                                                    | Ssewamala <i>et al.</i> | 2010 | SUUBI Research Programme                                                                            | No        | No              | 6,7                   | Uganda       | RCT    | 277                           | NR               | Unclear                                                      |
|                                                                                         | Hallman <i>et al.</i>   | 2011 | Siyakha Nentsha Programme                                                                           | No        | No              | 6,7                   | South Africa | Quasi  | NR                            | NR               | Unclear                                                      |

| Review author(s)<br>Conclusion:<br>Positive Effect<br>No Effect<br>Inconclusive / Mixed | Intervention author(s)      | Year        | Programme name/description                                                                                                                                         | Delivery* |                 | WHO Domain (1-7)<br>† | Country       | Design        | No of Participants                  | Participants m/f       | Intervention objective: gender-transformative Aim/By-product |
|-----------------------------------------------------------------------------------------|-----------------------------|-------------|--------------------------------------------------------------------------------------------------------------------------------------------------------------------|-----------|-----------------|-----------------------|---------------|---------------|-------------------------------------|------------------------|--------------------------------------------------------------|
|                                                                                         |                             |             |                                                                                                                                                                    | Men only  | Community level |                       |               |               |                                     |                        |                                                              |
| Haberland 2015<br><br>Positive Effect                                                   | Allen <i>et al.</i>         | 1997        | Teen Outreach Programme                                                                                                                                            | No        | No              | 1,4,6                 | United States | RCT           | 695                                 | 15% male, 85% female   | Aim                                                          |
|                                                                                         | Cowen <i>et al.</i>         | 2010        | Regai Dzive Shiri: Youth programmes for schools (used MEMA Kwa Vijana curriculum, adding sessions on gender issues, communication, self-belief and self-awareness) | NR        | Yes             | 1,4,6                 | Zimbabwe      | RCT           | 4684                                | NR                     | Aim                                                          |
|                                                                                         | Cowen <i>et al.</i>         | 2008        | See Cowen <i>et al.</i> (2010) above.                                                                                                                              | NR        | Yes             | 1,4,6                 | Zimbabwe      | RCT           | 4684                                | NR                     | Aim                                                          |
|                                                                                         | Dupas                       | 2011        | Relative Risk Information Campaign                                                                                                                                 | NR        | No              | 1,4,6                 | Kenya         | RCT           | 328                                 | NR                     | Aim                                                          |
|                                                                                         | Jewkes <i>et al.</i>        | 2008        | Stepping Stones: Adapted for South Africa                                                                                                                          | No        | Yes             | 1,4,6                 | South Africa  | RCT           | 2776                                | 1360 male, 1416 female | Aim                                                          |
|                                                                                         | Philliber                   | 2002        | Children's Aid Society-Carrera Programme                                                                                                                           | No        | Yes             | 1,4,6                 | United States | RCT           | 484                                 | 55% female, 45% male   | Aim                                                          |
|                                                                                         | Ross <i>et al.</i>          | 2007        | MEMA kwa Vijana                                                                                                                                                    | NR        | Yes             | 1,4,6                 | Tanzania      | RCT           | 9645                                | NR                     | Aim                                                          |
|                                                                                         | Osabi <i>et al.</i>         | 2006        | MEMA kwa Vijana                                                                                                                                                    | NR        | Yes             | 1,4,6                 | Tanzania      | RCT           | 9645                                | NR                     | Aim                                                          |
|                                                                                         | Doyle <i>et al.</i>         | 2010        | MEMA kwa Vijana                                                                                                                                                    | NR        | Yes             | 1,4,6                 | Tanzania      | RCT           | 9645                                | NR                     | Aim                                                          |
| Harrison <i>et al.</i> 2010<br><br>Positive Effect                                      | Exner <i>et al.</i>         | 2006        | Mpondombili Project                                                                                                                                                | No        | No              | 4,6,7                 | South Africa  | Quasi         | 442 (intervention); 541 (control)   | NR                     | Aim                                                          |
|                                                                                         | Jewkes <i>et al.</i>        | 2006, 2008  | Stepping Stones                                                                                                                                                    | No        | Yes             | 4,6,7                 | South Africa  | RCT           | 1140 (intervention); 1081 (control) | NR                     | Aim                                                          |
| Heise 2011<br><br>Inconclusive / Mixed                                                  | Kim                         | 2009        | IMAGE                                                                                                                                                              | No        | Yes             | 7                     | South Africa  | Community RCT | NR                                  | NR                     | Aim                                                          |
|                                                                                         | Jewkes (combined reporting) | 2008 & 2010 | Stepping Stones                                                                                                                                                    | No        | No              | 1,7,4                 | South Africa  | Cluster RCT   | 2776                                | 1360 Male/1416 Female  | Aim                                                          |
|                                                                                         | Verma                       | 2008        | Yaari Dosti                                                                                                                                                        | Yes       | No              | 4,6,7                 | India         | Quasi         | 1138                                | 1138 Men               | Aim                                                          |
|                                                                                         | Bradley <i>et al.</i>       | 2009        | Structured Videos                                                                                                                                                  | No        | No              | 6,7                   | USA           | Unknown       | 309                                 | 113 male/196 females   | NR                                                           |

| Review author(s)<br>Conclusion:<br>Positive Effect<br>No Effect<br>Inconclusive / Mixed | Intervention author(s)     | Year | Programme name/description                                                | Delivery* |                 | WHO Domain (1-7)<br>† | Country             | Design  | No of Participants | Participants m/f        | Intervention objective: gender-transformative Aim/By-product |
|-----------------------------------------------------------------------------------------|----------------------------|------|---------------------------------------------------------------------------|-----------|-----------------|-----------------------|---------------------|---------|--------------------|-------------------------|--------------------------------------------------------------|
|                                                                                         |                            |      |                                                                           | Men only  | Community level |                       |                     |         |                    |                         |                                                              |
| <b>Jennings et al. 2017</b><br><br>Inconclusive / Mixed                                 | Davis and Liddell          | 2002 | Structured Videos and Discussion                                          | Yes       | No              | 6,7                   | Midwestern USA      | Unknown | 87                 | 87 Male                 | NR                                                           |
|                                                                                         | Foshee                     | 1998 | Safe Dates:                                                               | No        | Yes             | 6,7                   | North Carolina, USA | RCT     | 1866               | 48.9% male/51.1% female | NR                                                           |
|                                                                                         | Foshee                     | 2000 | Safe Dates:                                                               | No        | Yes             | 6,7                   | North Carolina, USA | RCT     | 1866               | 48.9% male/51.1% female | NR                                                           |
|                                                                                         | Foshee                     | 2005 | Safe Dates                                                                | No        | Yes             | 6,7                   | North Carolina, USA | RCT     | 1866               | 48.9% male/51.1% female | NR                                                           |
|                                                                                         | Schwartz et al.            | 2004 | Psycho-Educational                                                        | No        | No              | 6,7                   | Southern USA        | RCT     | 58                 | NR                      | NR                                                           |
|                                                                                         | Pinzone-Glover et al.      | 1998 | Discussion and Worksheets                                                 | No        | No              | 6,7                   | Midwestern USA      | RCT     | 152                | 59 Male/93 Female       | NR                                                           |
|                                                                                         | Salazar and Cook           | 2006 | Videos, Discussions, attendance of batterer's programme                   | No        | No              | 6,7                   | Georgia, USA        | RCT     | 47                 | 47 Male                 | NR                                                           |
| <b>Jewell &amp; Wormith 2010</b><br><br>Inconclusive / Mixed                            | Babcock & Steiner          | 1999 | NR                                                                        | No        | No              | 7                     | NR                  | Quasi   | 355                | 91.8% Male              | NR                                                           |
|                                                                                         | Bowen & Gilchrist          | 2006 | NR                                                                        | Yes       | No              | 7                     | NR                  | Quasi   | 120                | 100% Male               | NR                                                           |
|                                                                                         | Chang & Saunders           | 2002 | NR                                                                        | Yes       | No              | 7                     | NR                  | Quasi   | 178                | 100% male               | NR                                                           |
|                                                                                         | Dalton                     | 2001 | NR                                                                        | No        | No              | 7                     | NR                  | Quasi   | 85                 | 32% Male                | NR                                                           |
|                                                                                         | DeMaris                    | 1989 | NR                                                                        | Yes       | No              | 7                     | NR                  | Quasi   | 295                | 100% Male               | NR                                                           |
|                                                                                         | Duplantis, Romands, & Bear | 2006 | NR                                                                        | Yes       | No              | 7                     | NR                  | Quasi   | 313                | 100% Male               | NR                                                           |
|                                                                                         | Gerlock                    | 2001 | NR                                                                        | Yes       | No              | 7                     | NR                  | Quasi   | 61                 | 100% Male               | NR                                                           |
|                                                                                         | Gordon & Moriarty          | 2003 | NR                                                                        | Yes       | No              | 7                     | NR                  | Quasi   | 132                | 100% Male               | NR                                                           |
| <b>Keleher &amp; Franklin 2008</b><br><br>Inconclusive / Mixed                          | NR                         | NR   | Program H                                                                 | NR        | NR              | 7                     | Brazil              | Quasi   | NR                 | NR                      | Aim                                                          |
|                                                                                         | NR                         | NR   | Program H                                                                 | NR        | NR              | 7                     | India               | Quasi   | NR                 | NR                      | Aim                                                          |
|                                                                                         | Barker et al.              | 2007 | Stepping Stones                                                           | NR        | NR              | 7                     | South Africa        | RCT     | NR                 | NR                      | Aim                                                          |
| <b>Kraft et al. 2014</b>                                                                | Daniel et al.              | 2008 | Group meetings, workshops, infotainment, couples counselling (if married) | No        | No              | 1,6,7                 | India               | NR      | NR                 | NR                      | Can't tell                                                   |



| Review author(s)<br>Conclusion:<br>Positive Effect<br>No Effect<br>Inconclusive / Mixed | Intervention author(s)  | Year | Programme name/description                                                    | Delivery* |                 | WHO Domain (1-7)<br>† | Country     | Design | No of Participants | Participants m/f | Intervention objective: gender-transformative Aim/By-product |
|-----------------------------------------------------------------------------------------|-------------------------|------|-------------------------------------------------------------------------------|-----------|-----------------|-----------------------|-------------|--------|--------------------|------------------|--------------------------------------------------------------|
|                                                                                         |                         |      |                                                                               | Men only  | Community level |                       |             |        |                    |                  |                                                              |
| Inconclusive / Mixed                                                                    | Daniel & Nanda          | 2012 | See Daniel et al (2008)                                                       | No        | No              | 1,6,7                 | India       | NR     | NR                 | NR               | Aim                                                          |
|                                                                                         | Sebastian <i>et al.</i> | 2012 | "First Time Parent Project"                                                   | No        | No              | 1,6                   | India       | NR     | NR                 | NR               | Can't tell                                                   |
|                                                                                         | Santhya <i>et al.</i>   | 2008 | "First Time Parent Project"                                                   | No        | No              | 1,2,6                 | India       | NR     | NR                 | NR               | Aim                                                          |
|                                                                                         | Shattuck <i>et al.</i>  | 2011 | Individual education, counseling, and learning activities                     | Yes       | No              | 1                     | Malawi      | NR     | NR                 | NR               | Can't tell                                                   |
|                                                                                         | Exner <i>et al.</i>     | 2009 | Intensive workshops (education, adult learning activities)                    | Yes       | No              | 1,4                   | Nigeria     | NR     | NR                 | NR               | Can't tell                                                   |
|                                                                                         | Schuler <i>et al.</i>   | 2012 | Group sessions for men, women, and couples                                    | No        | No              | Can't tell            | Tanzania    | NR     | NR                 | NR               | Aim                                                          |
|                                                                                         | Schuler & Ramirez       | 2012 | Group sessions for men, women, and couples                                    | No        | No              | Can't tell            | Guatemala   | NR     | NR                 | NR               | Aim                                                          |
|                                                                                         | Lundgren <i>et al.</i>  | 2005 | Family planning education included in safe water activities, 2 in-home visits | No        | No              | 1                     | El Salvador | NR     | NR                 | NR               | Can't tell                                                   |
|                                                                                         | Blake & Babalola        | 2002 | Radio, print, community mobilisation                                          | No        | Yes             | 1                     | Guinea      | NR     | NR                 | 100% male        | Aim                                                          |
|                                                                                         | Kim & Marangwanda       | 1997 | Radio, print, community mobilisation                                          | No        | Yes             | 1                     | Zimbabwe    | NR     | NR                 | 100% male        | Aim                                                          |
|                                                                                         | Phillips <i>et al.</i>  | 2012 | "Navrongo Community Health and Family Planning Project"                       | No        | Yes             | 1,2                   | Ghana       | NR     | NR                 | 100% male        | Aim                                                          |
|                                                                                         | Pence <i>et al.</i>     | 2007 | Navrongo Community Health and Family Planning Project                         | No        | Yes             | 1,2                   | Ghana       | NR     | NR                 | 100% male        | Aim                                                          |
| Lopez <i>et al.</i> 2009                                                                | Wight <i>et al.</i>     | 2002 | Reduce unsafe sex behaviour and unwanted pregnancy: students, 13 to 15 years  | No        | No              | 1,4,6                 | Scotland    | RCT    | 8430               | NR               | Aim                                                          |
| Inconclusive / Mixed                                                                    |                         |      |                                                                               |           |                 |                       |             |        |                    |                  |                                                              |
| McCloskey <i>et al.</i> 2016                                                            | Pulerwitz <i>et al.</i> | 2010 | Male Normals Initiative (MNI)                                                 | Yes       | Yes             | 7                     | Ethiopia    | Quasi  | 729                | 729 Male         | Aim                                                          |

| Review author(s)<br>Conclusion:<br>Positive Effect<br>No Effect<br>Inconclusive / Mixed                                          | Intervention author(s)         | Year | Programme name/description                  | Delivery* |                 | WHO Domain (1-7)<br>† | Country      | Design | No of Participants                                      | Participants m/f        | Intervention objective: gender-transformative Aim/By-product |
|----------------------------------------------------------------------------------------------------------------------------------|--------------------------------|------|---------------------------------------------|-----------|-----------------|-----------------------|--------------|--------|---------------------------------------------------------|-------------------------|--------------------------------------------------------------|
|                                                                                                                                  |                                |      |                                             | Men only  | Community level |                       |              |        |                                                         |                         |                                                              |
| Inconclusive / Mixed                                                                                                             | Wagman <i>et al.</i>           | 2015 | SHARE                                       | No        | Yes             | 4, 7                  | Uganda       | RCT    | 11448                                                   | NR                      | Aim                                                          |
|                                                                                                                                  | Ambramsky <i>et al.</i>        | 2014 | SASA!                                       | No        | Yes             | 4,7                   | Uganda       | RCT    | 2776                                                    | 1360 Males/1416 Females | Aim                                                          |
|                                                                                                                                  | Jewkes <i>et al.</i>           | 2008 | Stepping Stones                             | No        | No              | 4,6                   | South Africa | RCT    | 2776                                                    | 1360 Males/1416 Females | Aim                                                          |
|                                                                                                                                  | Proynk <i>et al.</i>           | 2008 | IMAGE                                       | No        | No              | 4,7                   | South Africa | RCT    | 23376                                                   | NR                      | Aim                                                          |
|                                                                                                                                  | Keller <i>et al.</i>           | 2015 | Your Moment of Truth (YMOT)                 | Yes       | No              | 6,7                   | Kenya        | Quasi  | 1836                                                    | 1836 Male               | Aim                                                          |
| Napierala Mavedzenge <i>et al.</i> 2011<br>*interventions grouped by programme rather than by study*<br><br>Inconclusive / Mixed | Ross <i>et al.</i>             | 2007 | MEMA kwa Vijana                             | No        | No              | 1,4,6                 | Tanzania     | RCT    | 9645                                                    | 55% Male/ 45% Female    | Aim                                                          |
|                                                                                                                                  | Terris-Prestholt <i>et al.</i> | 2006 | MEMA kwa Vijana                             | No        | No              | 1,4,6                 | Tanzania     | RCT    | 9645                                                    | 55% Male/ 45% Female    | Aim                                                          |
|                                                                                                                                  | Hayes <i>et al.</i>            | 2005 | MEMA kwa Vijana                             | No        | No              | 1,4,6                 | Tanzania     | RCT    | 9645                                                    | 55% Male/ 45% Female    | Aim                                                          |
|                                                                                                                                  | Osabi <i>et al.</i>            | 2006 | MEMA kwa Vijana                             | No        | No              | 1,4,6                 | Tanzania     | RCT    | 9645                                                    | 55% Male/ 45% Female    | Aim                                                          |
|                                                                                                                                  | Doyle <i>et al.</i>            | 2009 | MEMA kwa Vijana                             | No        | No              | 1,4,6                 | Tanzania     | RCT    | 9645                                                    | 55% Male/ 45% Female    | Aim                                                          |
|                                                                                                                                  | James <i>et al.</i>            | 2006 | Department of Education Life Skills Program | No        | No              | 4,6                   | South Africa | Quasi  | 1141                                                    | 49% Male/ 51% Female    | Aim                                                          |
|                                                                                                                                  | Cowan <i>et al.</i>            | 2009 | Regai Dzive Shiri                           | No        | No              | 1,4,6,                | Zimbabwe     | RCT    | 6791                                                    | 52% Male/ 48% Female    | Aim                                                          |
|                                                                                                                                  | Hayes <i>et al.</i>            | 2005 | Regai Dzive Shiri                           | No        | No              | 1,4,6                 | Zimbabwe     | RCT    | 6791                                                    | 52% Male/ 48% Female    |                                                              |
|                                                                                                                                  | Jewkes <i>et al.</i>           | 2007 | Stepping Stones                             | NR        | No              | 4,6                   | South Africa | NR     | 2776                                                    | NR                      | NR                                                           |
|                                                                                                                                  | Jewkes <i>et al.</i>           | 2006 | Stepping Stones                             | NR        | No              | 4,6                   | South Africa | RCT    | 2776                                                    | NR                      |                                                              |
|                                                                                                                                  | Jewkes <i>et al.</i>           | 2008 | Stepping Stones                             | NR        | No              | 4,6                   | South Africa | RCT    | 2776                                                    | NR                      |                                                              |
|                                                                                                                                  | Hargreaves                     | 2009 | IMAGE                                       | No        | No              | 1,4,6                 | South Africa | RCT    | 3895                                                    | 56% Female/ 44% Male    | Aim                                                          |
|                                                                                                                                  | Proynk <i>et al.</i>           | 2008 | IMAGE                                       | No        | No              | 1,4,6                 | South Africa | RCT    | 3895                                                    | 56% Female/ 44% Male    |                                                              |
|                                                                                                                                  | Proynk <i>et al.</i>           | 2008 | IMAGE                                       | No        | No              | 1,4,6                 | South Africa | RCT    | 3895                                                    | 56% Female/ 44% Male    |                                                              |
| Remme <i>et al.</i> 2014                                                                                                         | Jewkes <i>et al.</i>           | 2008 | Stepping Stones                             | No        | Yes             | 4,6,7                 | South Africa | RCT    | 70 study clusters comprised 64 villages and 6 townships | 1360 men; 1416 women    | Aim                                                          |

| Review author(s)<br>Conclusion:<br>Positive Effect<br>No Effect<br>Inconclusive / Mixed                     | Intervention author(s)  | Year               | Programme name/description                                                                                                                                                                                                                       | Delivery* |                 | WHO Domain (1-7)<br>† | Country      | Design                  | No of Participants                                                                                                                         | Participants m/f | Intervention objective: gender-transformative Aim/By-product |
|-------------------------------------------------------------------------------------------------------------|-------------------------|--------------------|--------------------------------------------------------------------------------------------------------------------------------------------------------------------------------------------------------------------------------------------------|-----------|-----------------|-----------------------|--------------|-------------------------|--------------------------------------------------------------------------------------------------------------------------------------------|------------------|--------------------------------------------------------------|
|                                                                                                             |                         |                    |                                                                                                                                                                                                                                                  | Men only  | Community level |                       |              |                         |                                                                                                                                            |                  |                                                              |
| Inconclusive / Mixed                                                                                        | Pulerwitz <i>et al.</i> | 2006               | Intervention (a) interactive group education sessions for young men led by adult male facilitators. Intervention (b) group education community-wide "lifestyle" social marketing campaign to promote condom use using gender-equitable messages. | Yes       | Yes             | 4,6,7                 | Brazil       | Quasi                   | 2 sites 1 control site 508 young men                                                                                                       | 100% men         | Aim                                                          |
|                                                                                                             | Verma <i>et al.</i>     | 2006               | See Pulerwitz <i>et al.</i> (2006) above                                                                                                                                                                                                         | Yes       | Yes             | 4,6,7                 | India        | Quasi                   | 1423 married and unmarried young men aged 16-29 in urban settings and aged 15-24 in rural settings                                         | 100              | Aim                                                          |
|                                                                                                             | Abramsky <i>et al.</i>  | 2014               | SASA!                                                                                                                                                                                                                                            | No        | Yes             | 4,6,7                 | Uganda       | RCT                     | 4 intervention and 4 control communities Random sample of adult community members sampled at baseline (n1583) and postintervention (n2532) | NR               | Aim                                                          |
| Ricardo <i>et al.</i> 2011*<br>Only moderate and high quality study details reported<br><br>Positive Effect | Foshee <i>et al.</i>    | 1998 ; 2000 ; 2004 | NR                                                                                                                                                                                                                                               | No        | NR              | 1,7                   | USA          | Unclear if RCT or Quasi | n=460                                                                                                                                      | 41.5% male       | Aim                                                          |
|                                                                                                             | Gidycz <i>et al.</i>    | 2011               | NR                                                                                                                                                                                                                                               | Yes       | NR              | 1,7                   | USA          | Unclear if RCT or Quasi | n=494                                                                                                                                      | 100% male        | Aim                                                          |
|                                                                                                             | Jewkes <i>et al.</i>    | 2008               | NR                                                                                                                                                                                                                                               | No        | NR              | 1,7                   | South Africa | Unclear if RCT or Quasi | n=2776                                                                                                                                     | 49% male         | Aim                                                          |
|                                                                                                             | Taylor <i>et al.</i>    | 2010               | NR                                                                                                                                                                                                                                               | No        | NR              | 1,7                   | USA          | Unclear if RCT or Quasi | n=1592                                                                                                                                     | 48% male         | Aim                                                          |

| Review author(s)<br>Conclusion:<br>Positive Effect<br>No Effect<br>Inconclusive / Mixed | Intervention author(s)  | Year    | Programme name/description | Delivery* |                 | WHO Domain (1-7)<br>† | Country  | Design                  | No of Participants | Participants m/f | Intervention objective: gender-transformative Aim/By-product |
|-----------------------------------------------------------------------------------------|-------------------------|---------|----------------------------|-----------|-----------------|-----------------------|----------|-------------------------|--------------------|------------------|--------------------------------------------------------------|
|                                                                                         |                         |         |                            | Men only  | Community level |                       |          |                         |                    |                  |                                                              |
|                                                                                         | Gidycz <i>et al.</i>    | 2001    | NR                         | No        | NR              | 1,7                   | USA      | Unclear if RCT or Quasi | n=1108             | 27% male         | Aim                                                          |
|                                                                                         | Lobo                    | 2004    | NR                         | Yes       | NR              | 1,7                   | USA      | Unclear if RCT or Quasi | n=237              | 100% male        | Aim                                                          |
|                                                                                         | Kantor                  | No date | NR                         | No        | NR              | 1,7                   | USA      | Unclear if RCT or Quasi | n=157              | 42% male         | Aim                                                          |
|                                                                                         | Stephens & George       | 2009    | NR                         | Yes       | NR              | 1,7                   | USA      | Unclear if RCT or Quasi | n=65               | 100% male        | Aim                                                          |
|                                                                                         | Jaycox <i>et al.</i>    | 2006    | NR                         | No        | NR              | 1,7                   | USA      | Unclear if RCT or Quasi | n=2540             | 48% male         | Aim                                                          |
|                                                                                         | Kerpelman <i>et al.</i> | 2009    | NR                         | NR        | NR              | 1,7                   | USA      | Unclear if RCT or Quasi | n=249              | NR               | Aim                                                          |
|                                                                                         | Wolfe <i>et al.</i>     | 2009    | NR                         | No        | NR              | 1,7                   | Canada   | Unclear if RCT or Quasi | n=1722             | 47.2% male       | Aim                                                          |
|                                                                                         | Gardner & Boellaard     | 2007    | NR                         | No        | NR              | 1,7                   | USA      | Unclear if RCT or Quasi | n=150              | 19.4% male       | Aim                                                          |
|                                                                                         | Pulerwitz <i>et al.</i> | 2010    | NR                         | Yes       | NR              | 1,7                   | Ethiopia | Unclear if RCT or Quasi | n=645              | 100% male        | Aim                                                          |
|                                                                                         | Verma <i>et al.</i>     | 2008    | NR                         | Yes       | NR              | 1,7                   | India    | Unclear if RCT or Quasi | n=1137             | 100% male        | Aim                                                          |
|                                                                                         | Wolfe <i>et al.</i>     | 2003    | NR                         | No        | NR              | 1,7                   | Canada   | Unclear if RCT or Quasi | n=158              | 50% male         | Aim                                                          |
|                                                                                         | Banyard <i>et al.</i>   | 2007    | NR                         | No        | NR              | 1,7                   | USA      | Unclear if RCT or Quasi | n=389              | 44% male         | Aim                                                          |
|                                                                                         | Davis & Liddell         | 2002    | NR                         | Yes       | NR              | 1,7                   | USA      | Unclear if RCT or Quasi | n=87               | 100% male        | Aim                                                          |

| Review author(s)<br>Conclusion:<br>Positive Effect<br>No Effect<br>Inconclusive / Mixed | Intervention author(s)         | Year | Programme name/description | Delivery* |                 | WHO Domain (1-7)<br>† | Country      | Design                  | No of Participants | Participants m/f | Intervention objective: gender-transformative Aim/By-product |
|-----------------------------------------------------------------------------------------|--------------------------------|------|----------------------------|-----------|-----------------|-----------------------|--------------|-------------------------|--------------------|------------------|--------------------------------------------------------------|
|                                                                                         |                                |      |                            | Men only  | Community level |                       |              |                         |                    |                  |                                                              |
|                                                                                         | Fay & Medway                   | 2006 | NR                         | No        | NR              | 1,7                   | USA          | Unclear if RCT or Quasi | n=154              | 44% male         | Aim                                                          |
|                                                                                         | Foubert & Marriot              | 1997 | NR                         | Yes       | NR              | 1,7                   | USA          | Unclear if RCT or Quasi | n=77               | 100% male        | Aim                                                          |
|                                                                                         | Hillenbrand-Gunn <i>et al.</i> | 2010 | NR                         | No        | NR              | 1,7                   | USA          | Unclear if RCT or Quasi | n=212              | 60% male         | Aim                                                          |
|                                                                                         | Macgowan                       | 1997 | NR                         | No        | NR              | 1,7                   | USA          | Unclear if RCT or Quasi | n=440              | 43.9% male       | Aim                                                          |
|                                                                                         | Roberts                        | 2009 | NR                         | No        | NR              | 1,7                   | USA          | Unclear if RCT or Quasi | n=332              | 49% male         | Aim                                                          |
|                                                                                         | Soul City                      | 2006 | NR                         | No        | NR              | 1,7                   | South Africa | Unclear if RCT or Quasi | n=1877             | 49% male         | Aim                                                          |
|                                                                                         | Weisz & Black                  | 2001 | NR                         | No        | NR              | 1,7                   | USA          | Unclear if RCT or Quasi | n=66               | 42% male         | Aim                                                          |
|                                                                                         | Gruchow & Brown                | 2011 | NR                         | Yes       | NR              | 1,7                   | USA          | Unclear if RCT or Quasi | n=230              | 100% male        | Aim                                                          |
|                                                                                         | Pulerwitz <i>et al.</i>        | 2006 | NR                         | Yes       | NR              | 1,7                   | Brazil       | Unclear if RCT or Quasi | n=609              | 100% male        | Aim                                                          |
|                                                                                         | Solórzano <i>et al.</i>        | 2008 | NR                         | No        | NR              | 1,7                   | Nicaragua    | Unclear if RCT or Quasi | n=4800             | 46% male         | Aim                                                          |
|                                                                                         | Winkel & DeKleuver             | 1997 | NR                         | No        | NR              | 1,7                   | Netherlands  | Unclear if RCT or Quasi | n=198              | 31% male         | Aim                                                          |
|                                                                                         | Moynihan <i>et al.</i>         | 2011 | NR                         | No        | NR              | 1,7                   | USA          | Unclear if RCT or Quasi | n=98               | 56.8% male       | Aim                                                          |
|                                                                                         | Moynihan <i>et al.</i>         | 2010 | NR                         | No        | NR              | 1,7                   | USA          | Unclear if RCT or Quasi | n=98               | 56.8% male       | Aim                                                          |

| Review author(s)<br>Conclusion:<br>Positive Effect<br>No Effect<br>Inconclusive / Mixed | Intervention author(s)            | Year | Programme name/description                                                                                                        | Delivery* |                 | WHO Domain (1-7)<br>† | Country      | Design | No of Participants | Participants m/f      | Intervention objective: gender-transformative Aim/By-product |
|-----------------------------------------------------------------------------------------|-----------------------------------|------|-----------------------------------------------------------------------------------------------------------------------------------|-----------|-----------------|-----------------------|--------------|--------|--------------------|-----------------------|--------------------------------------------------------------|
|                                                                                         |                                   |      |                                                                                                                                   | Men only  | Community level |                       |              |        |                    |                       |                                                              |
| <b>Sarkar et al 2015</b><br><br>Positive Effect                                         | Shattuck <i>et al.</i>            | 2011 | MMM (Malawi Male Motivator)                                                                                                       | No        | No              | 1                     | Malawi       | RCT    | NR                 | NR                    | Aim                                                          |
| <b>Skevington et al 2013</b><br><br>Positive Effect                                     | Pacific Regional HIV/AIDS Project | 2007 | Stepping Stones                                                                                                                   | No        | Yes             | 4,6                   | Fiji         | RCT    | 627                | NR                    | Aim                                                          |
|                                                                                         | Hadjipateras <i>et al.</i>        | 2006 | Stepping Stones                                                                                                                   | No        | Yes             | 4,6                   | Angola       | RCT    | 633                | NR                    | Aim                                                          |
|                                                                                         | Hadjipateras <i>et al.</i>        | 2006 | Stepping Stones                                                                                                                   | No        | Yes             | 4,6                   | Tanzania     | RCT    | 674                | NR                    | Aim                                                          |
|                                                                                         | Hadjipateras <i>et al.</i>        | 2006 | Stepping Stones                                                                                                                   | No        | Yes             | 4,6                   | Uganda       | RCT    | 1478               | NR                    | Aim                                                          |
|                                                                                         | Bradley <i>et al.</i>             | 2009 | Stepping Stones                                                                                                                   | No        | Yes             | 4,6                   | India        | RCT    | 6800               | NR                    | Aim                                                          |
|                                                                                         | Jewkes <i>et al.</i>              | 2006 | Stepping Stones                                                                                                                   | Yes       | Yes             | 4,6                   | South Africa | RCT    | 2776               | 1360 Men/1416 Women   | Aim                                                          |
|                                                                                         | Pain <i>et al.</i>                | 2002 | Stepping Stones                                                                                                                   | No        | Yes             | 4,6                   | The Gambia   | RCT    | 945                | NR                    | Aim                                                          |
|                                                                                         | Bhattacharjee and Costigan        | 2005 | Stepping Stones                                                                                                                   | No        | Yes             | 4,6                   | Ethiopia     | RCT    | 696                | NR                    | Aim                                                          |
|                                                                                         | Jurjue <i>et al.</i>              | 2000 | Stepping Stones                                                                                                                   | No        | Yes             | 4,6                   | The Gambia   | RCT    | NR                 | NR                    | Aim                                                          |
| <b>Small et al. 2013</b><br><br>Positive Effect                                         | Paine <i>et al.</i>               | 2002 | Stepping stones:                                                                                                                  | No        | Yes             | 4                     | Gambia       | Quasi  | 563                | NR                    | Aim                                                          |
|                                                                                         | Jewkes <i>et al.</i>              | 2008 | Stepping stones:                                                                                                                  | No        | Yes             | 4,6                   | South Africa | RCT    | 2776               | 1,360 men/1,416 women | Aim                                                          |
|                                                                                         | Kalichman <i>et al.</i>           | 2009 | Integrated gender-based violence and HIV risk reduction intervention: 'gender tailored' to men, curriculum on gender inequalities | Yes       | Yes             | 4                     | South Africa | Quasi  | 475                | 100% male             | Aim                                                          |
| <b>Smedslund et al. 2007</b><br><br>Inconclusive / Mixed                                | Labriola <i>et al.</i>            | 2005 | Bronx Experiment - CBT v No treatment                                                                                             | Yes       | No              | 7                     | USA          | RCT    | 420                | 100% male             | Aim                                                          |
|                                                                                         | Davis <i>et al.</i>               | 2000 | Brooklyn Experiment - CBT v No treatment                                                                                          | Yes       | No              | 7                     | USA          | RCT    | 376                | 100% male             | Aim                                                          |
|                                                                                         | Maxwell <i>et al.</i>             | 2004 | Brooklyn Experiment - CBT v No treatment                                                                                          | Yes       | No              | 7                     | USA          | RCT    | 376                | 100% male             | Aim                                                          |
|                                                                                         | Taylor <i>et al.</i>              | 2001 | Brooklyn Experiment - CBT v No treatment                                                                                          | Yes       | No              | 7                     | USA          | RCT    | 376                | 100% male             | Aim                                                          |

| Review author(s)<br>Conclusion:<br>Positive<br>Effect<br>No Effect<br>Inconclusive<br>/ Mixed | Intervention author(s) | Year | Programme name/description              | Delivery* |                 | WHO Domain (1-7)<br>† | Country | Design | No of Participants                                                                                                                                                                                                                             | Participants m/f                                                                                                                           | Intervention objective: gender-transformative Aim/By-product |
|-----------------------------------------------------------------------------------------------|------------------------|------|-----------------------------------------|-----------|-----------------|-----------------------|---------|--------|------------------------------------------------------------------------------------------------------------------------------------------------------------------------------------------------------------------------------------------------|--------------------------------------------------------------------------------------------------------------------------------------------|--------------------------------------------------------------|
|                                                                                               |                        |      |                                         | Men only  | Community level |                       |         |        |                                                                                                                                                                                                                                                |                                                                                                                                            |                                                              |
|                                                                                               | Feder & Dugan          | 2002 | Broward Experiment - CBT v No treatment | Yes       | No              | 7                     | USA     | RCT    | 404                                                                                                                                                                                                                                            | 100% male                                                                                                                                  | Aim                                                          |
|                                                                                               | Feder & Forde          | 2000 | Broward Experiment - CBT v No treatment | Yes       | No              | 7                     | USA     | RCT    | 404                                                                                                                                                                                                                                            | 100% male                                                                                                                                  | Aim                                                          |
|                                                                                               | Dunford                | 2000 | San Diego Navy - CBT v No treatment     | No        | No              | 7                     | USA     | RCT    | 861 couples - randomly assigned to four groups: a men's group (N = 218); a conjoint group (the men participating with their wives) (N = 216); a rigorously monitored group (N = 213), and a control group (N = 214) who received no treatment. | 50% male (?)                                                                                                                               | Aim                                                          |
|                                                                                               | Dunford                | 2000 | San Diego Navy - CBT v No treatment     | No        | No              | 7                     | USA     | RCT    | 861 couples - randomly assigned to four groups: a men's group (N = 218); a conjoint group (the men participating with their wives) (N = 216); a rigorously monitored group (N = 213), and a control group (N = 214) who received no treatment. | 50% male (?)                                                                                                                               | Aim                                                          |
|                                                                                               | Saunders               | 1996 | Wisconsin Study - CBT v Other therapy   | Yes*      | No              | 7                     | USA     | RCT    | 217                                                                                                                                                                                                                                            | 100% male* (The partners of 79% of the 136 treatment completers gave reports of the men's behaviour an average of 2 years post-treatment.) | Aim                                                          |
|                                                                                               | Easton                 | 2005 | Yale Study - CBT v Other therapy        | Yes*      | No              | 7                     | USA     | RCT    | 64                                                                                                                                                                                                                                             | 100% male* (collateral reports from female partners at baseline, monthly, and post-treatment periods)                                      | Aim                                                          |

| Review author(s)<br>Conclusion:<br>Positive Effect<br>No Effect<br>Inconclusive / Mixed | Intervention author(s) | Year | Programme name/description                                                                                                            | Delivery* |                 | WHO Domain (1-7)<br>† | Country      | Design | No of Participants                                | Participants m/f                                                                                      | Intervention objective: gender-transformative Aim/By-product |
|-----------------------------------------------------------------------------------------|------------------------|------|---------------------------------------------------------------------------------------------------------------------------------------|-----------|-----------------|-----------------------|--------------|--------|---------------------------------------------------|-------------------------------------------------------------------------------------------------------|--------------------------------------------------------------|
|                                                                                         |                        |      |                                                                                                                                       | Men only  | Community level |                       |              |        |                                                   |                                                                                                       |                                                              |
|                                                                                         | <i>Easton et al.</i>   | 2007 | Yale Study - CBT v Other therapy                                                                                                      | Yes*      | No              | 7                     | USA          | RCT    | 64                                                | 100% male* (collateral reports from female partners at baseline, monthly, and post-treatment periods) | Aim                                                          |
|                                                                                         | <i>Easton et al.</i>   | 2007 | Yale Study - CBT v Other therapy                                                                                                      | Yes*      | No              | 7                     | USA          | RCT    | 64                                                | 100% male* (collateral reports from female partners at baseline, monthly, and post-treatment periods) | Aim                                                          |
| <b>Storer et al. 2016</b><br>Positive Effect                                            | <i>Gidycz et al.</i>   | 2011 | "The Men's Project"                                                                                                                   | No        | No              | 7                     | USA          | RCT    | 635                                               | NR                                                                                                    | Aim                                                          |
|                                                                                         | <i>Miller et al.</i>   | 2012 | "Coaching Boys into Men"                                                                                                              | Yes       | Yes             | 6,7                   | USA          | Quasi  | 847 (intervention); 951 (control)                 | 100% male                                                                                             | Aim                                                          |
| Inconclusive / Mixed                                                                    | <i>Kunene et al.</i>   | 2005 | Facility-based couples' education at antenatal clinics                                                                                | No        | No              | 2                     | South Africa | RCT    | Intervention: 1337; Control: 1252                 | Men: 45.47% (intervention), 44.57% (control)                                                          | By-product                                                   |
|                                                                                         | <i>Midhet et al.</i>   | 2010 | Community-based education for men and women; training of traditional birth attendants; and community mobilisation to improve referral | No        | Yes             | 2                     | Pakistan     | RCT    | Intervention: 703; Comparison: 838; Control: 1022 | NR                                                                                                    | By-product                                                   |
|                                                                                         | <i>Mullany et al.</i>  | 2007 | Facility-based couples' education at antenatal clinics at a tertiary hospital                                                         | No        | No              | 2                     | Nepal        | RCT    | Intervention: 145; Comparison: 148; Control: 149  | NR                                                                                                    | By-product                                                   |
|                                                                                         | <i>Sahip et al.</i>    | 2007 | Workplace-based education for expectant fathers                                                                                       | Yes       | No              | 2                     | Turkey       | Quasi  | Intervention: 80; Control: 80                     | NR                                                                                                    | By-product                                                   |
|                                                                                         | <i>Varkey et al.</i>   | 2004 | Facility-based education for men and women individually or as a couple at antenatal clinics                                           | No        | No              | 2                     | India        | Quasi  | Intervention: 654; Control: 604                   | 50% male                                                                                              | By-product                                                   |



| Review author(s)<br>Conclusion:<br>Positive Effect<br>No Effect<br>Inconclusive / Mixed | Intervention author(s)                            | Year | Programme name/description                                                                                  | Delivery* |                 | WHO Domain (1-7)<br>† | Country    | Design | No of Participants                    | Participants m/f | Intervention objective: gender-transformative Aim/By-product |
|-----------------------------------------------------------------------------------------|---------------------------------------------------|------|-------------------------------------------------------------------------------------------------------------|-----------|-----------------|-----------------------|------------|--------|---------------------------------------|------------------|--------------------------------------------------------------|
|                                                                                         |                                                   |      |                                                                                                             | Men only  | Community level |                       |            |        |                                       |                  |                                                              |
|                                                                                         | Fullerton <i>et al.</i>                           | 2005 | Family and community education (home visits and group discussions)                                          | No        | Yes             | 2                     | India      | Quasi  | Baseline: 600; Post intervention: 833 | NR               | By-product                                                   |
|                                                                                         | Hossain <i>et al.</i>                             | 2006 | Family and community education (home visits and group discussions) and improved community-facility linkages | No        | Yes             | 2                     | Bangladesh | Quasi  | NR                                    | NR               | By-product                                                   |
| <b>Arango <i>et al.</i> 2014</b><br>Inconclusive / Mixed                                | Individual intervention study detail not reported |      |                                                                                                             |           |                 |                       |            |        |                                       |                  |                                                              |
| <b>Bakrania <i>et al.</i> 2018</b><br>Inconclusive / Mixed                              | Individual intervention study detail not reported |      |                                                                                                             |           |                 |                       |            |        |                                       |                  |                                                              |
| <b>Chatterjee 2015</b><br>Inconclusive / Mixed                                          | Individual intervention study detail not reported |      |                                                                                                             |           |                 |                       |            |        |                                       |                  |                                                              |
| <b>Hartmann <i>et al.</i> 2016</b><br>Inconclusive / Mixed                              | Individual intervention study detail not reported |      |                                                                                                             |           |                 |                       |            |        |                                       |                  |                                                              |
| <b>Krishnaratne <i>et al.</i> 2016</b><br>Inconclusive / Mixed                          | Individual intervention study detail not reported |      |                                                                                                             |           |                 |                       |            |        |                                       |                  |                                                              |
| <b>Lacroix <i>et al.</i> 2013</b><br>Positive Effect                                    | Individual intervention study detail not reported |      |                                                                                                             |           |                 |                       |            |        |                                       |                  |                                                              |
| <b>Muralidharan <i>et al.</i> 2014</b>                                                  | Individual intervention study detail not reported |      |                                                                                                             |           |                 |                       |            |        |                                       |                  |                                                              |

| Review author(s)<br>Conclusion:<br>Positive Effect<br>No Effect<br>Inconclusive / Mixed                                                                                                                                                                                                                                                                                                                                                                                                                                                                                                                                    | Intervention author(s) | Year | Programme name/description | Delivery* |                 | WHO Domain (1-7)<br>† | Country | Design | No of Participants | Participants m/f | Intervention objective: gender-transformative Aim/By-product |
|----------------------------------------------------------------------------------------------------------------------------------------------------------------------------------------------------------------------------------------------------------------------------------------------------------------------------------------------------------------------------------------------------------------------------------------------------------------------------------------------------------------------------------------------------------------------------------------------------------------------------|------------------------|------|----------------------------|-----------|-----------------|-----------------------|---------|--------|--------------------|------------------|--------------------------------------------------------------|
|                                                                                                                                                                                                                                                                                                                                                                                                                                                                                                                                                                                                                            |                        |      |                            | Men only  | Community level |                       |         |        |                    |                  |                                                              |
| Positive Effect                                                                                                                                                                                                                                                                                                                                                                                                                                                                                                                                                                                                            |                        |      |                            |           |                 |                       |         |        |                    |                  |                                                              |
| <b>Rankin et al. 2016</b><br>Inconclusive / Mixed                                                                                                                                                                                                                                                                                                                                                                                                                                                                                                                                                                          |                        |      |                            |           |                 |                       |         |        |                    |                  | Individual intervention study detail not reported            |
| <b>Rees et al. 2014</b><br>Inconclusive / Mixed                                                                                                                                                                                                                                                                                                                                                                                                                                                                                                                                                                            |                        |      |                            |           |                 |                       |         |        |                    |                  | Individual intervention study detail not reported            |
| <b>Schrivver et al. 2017</b><br>Inconclusive / Mixed                                                                                                                                                                                                                                                                                                                                                                                                                                                                                                                                                                       |                        |      |                            |           |                 |                       |         |        |                    |                  | Individual intervention study detail not reported            |
| <p>*Not reported (NR)<br/> †WHO Domain (1-7): 1. Helping people realize their desired family size; 2. Ensuring the health of pregnant women and girls and their new-born infants; 3. Preventing unsafe abortion; 4. Promoting sexual health and well-being; 5. Promoting sexual and reproductive health in disease outbreaks; 6. Promoting healthy adolescence for a healthy future, and unsafe abortion; harmful traditional practices, child, early, and forced marriage; and sexual coercion and intimate partner violence; 7. Preventing and responding to violence against women and girls and harmful practices.</p> |                        |      |                            |           |                 |                       |         |        |                    |                  |                                                              |
